# Supplementary material for: Endothelial cell CD36 optimizes tissue fatty acid uptake
Source: JCI journal article supplement (doi:10.1172/jci99315), 2018-07-26
Supplement: sd1 [file 1]

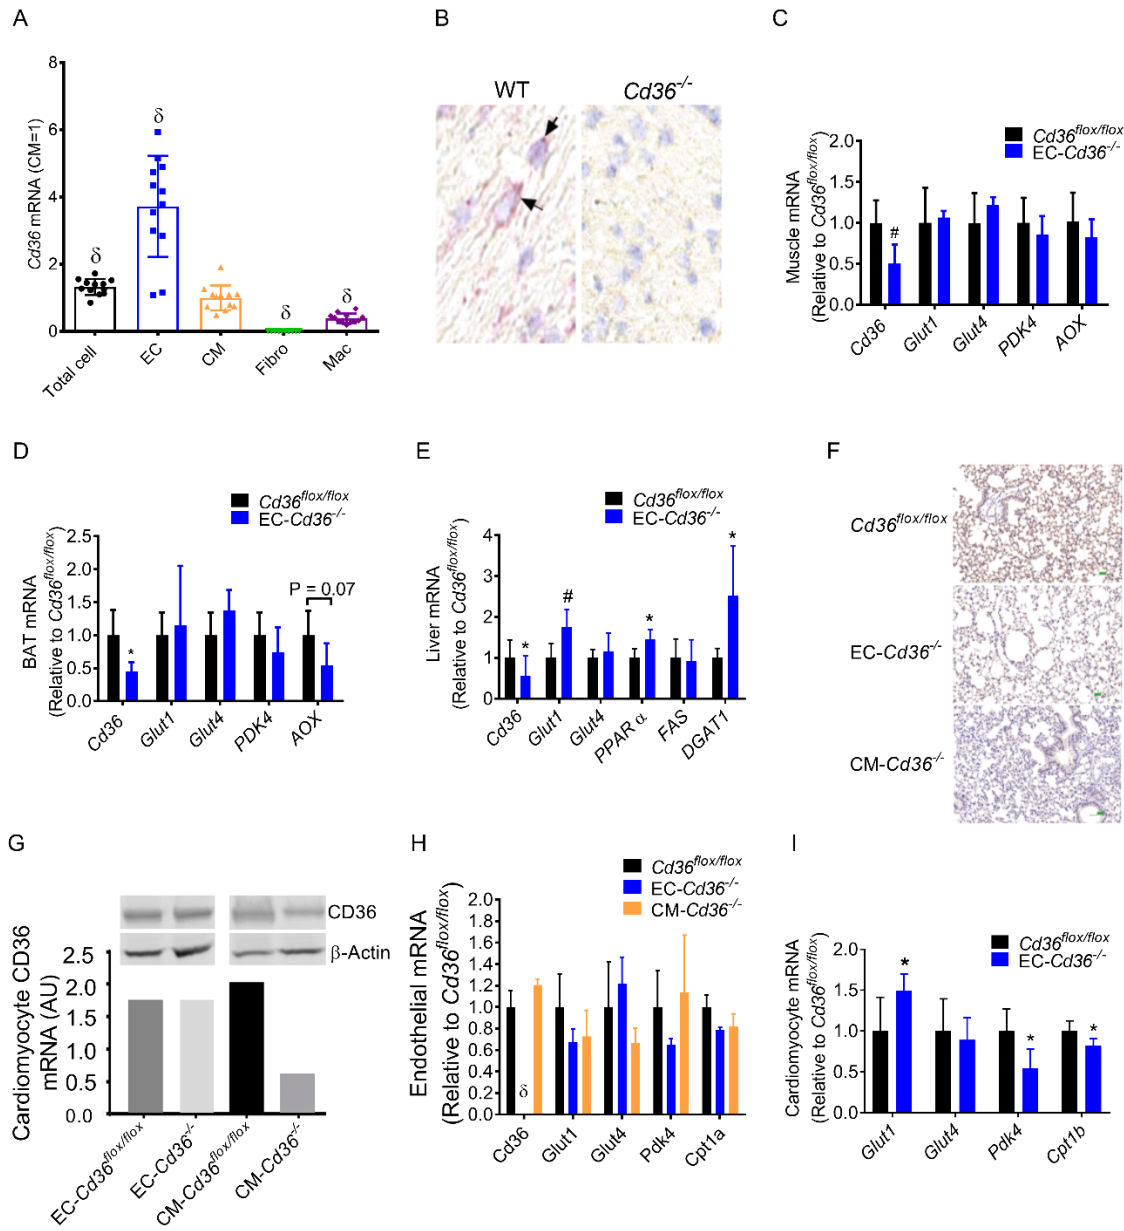

**Fig. S1. Immunostaining and mRNA expression in heart tissue and isolated ECs and CMs from *Cd36*<sup>flox/flox</sup>, EC- *Cd36*<sup>-/-</sup>, and CM-*Cd36*<sup>-/-</sup> mice. (A) Sub-organ CD36 mRNA levels in isolated fractionation of female mouse hearts. Data are mean ratios normalized to CM-*Cd36*<sup>-/-</sup> (set as 1.0). <sup>δ</sup>P < 0.0001 versus CM-*Cd36*<sup>-/-</sup> mice. (B) In situ identified specific CD36 mRNA in heart tissues (arrow). (C-E) mRNA expression in muscle, BAT, and liver of *Cd36*<sup>flox/flox</sup> and EC- *Cd36*<sup>-/-</sup> mice. (F) Anti-CD36 antibody stained sections from *Cd36*<sup>flox/flox</sup>, EC-*Cd36*<sup>-/-</sup>, and CM-*Cd36*<sup>-/-</sup> mouse lungs. (G) CM *Cd36* mRNA and protein expressions in *Cd36*<sup>flox/flox</sup>, EC- *Cd36*<sup>-/-</sup>, and CM-*Cd36*<sup>-/-</sup> mouse hearts. (H) qRT-PCR analysis of gene expression in ECs from *Cd36*<sup>flox/flox</sup> and EC-*Cd36*<sup>-/-</sup> mice and (I) CMs from EC-*Cd36*<sup>-/-</sup> mouse hearts.\*P < 0.05 and <sup>δ</sup>P < 0.0001 versus *Cd36*<sup>flox/flox</sup> mice. P values were calculated by one-way ANOVA with a Dunnett's multiple comparisons test.**

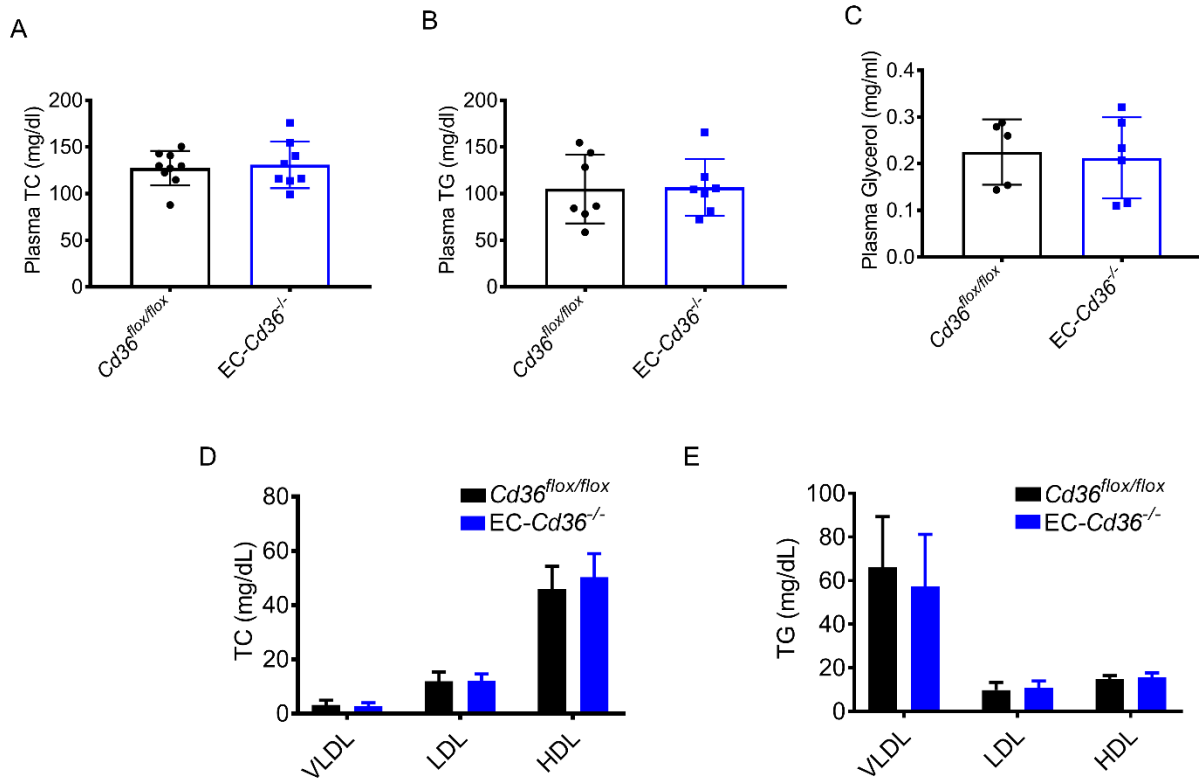

**Fig. S2. Plasma lipids, glycerol, and lipoprotein particles in 4-month-old  $EC-Cd36^{-/-}$  male mice fed chow diet.** (A) Plasma TC and (B) TG levels in  $Cd36^{flox/flox}$  and  $EC-Cd36^{-/-}$ , and  $CM-Cd36^{-/-}$  male mice. (C) Plasma glycerol in  $EC-Cd36^{-/-}$  mice. (D) TC and (E) TG levels of plasma lipoprotein particles. Data are means  $\pm$  S.D. (n=5-8). P values were calculated by one-way ANOVA with a Dunnett's multiple comparisons test.

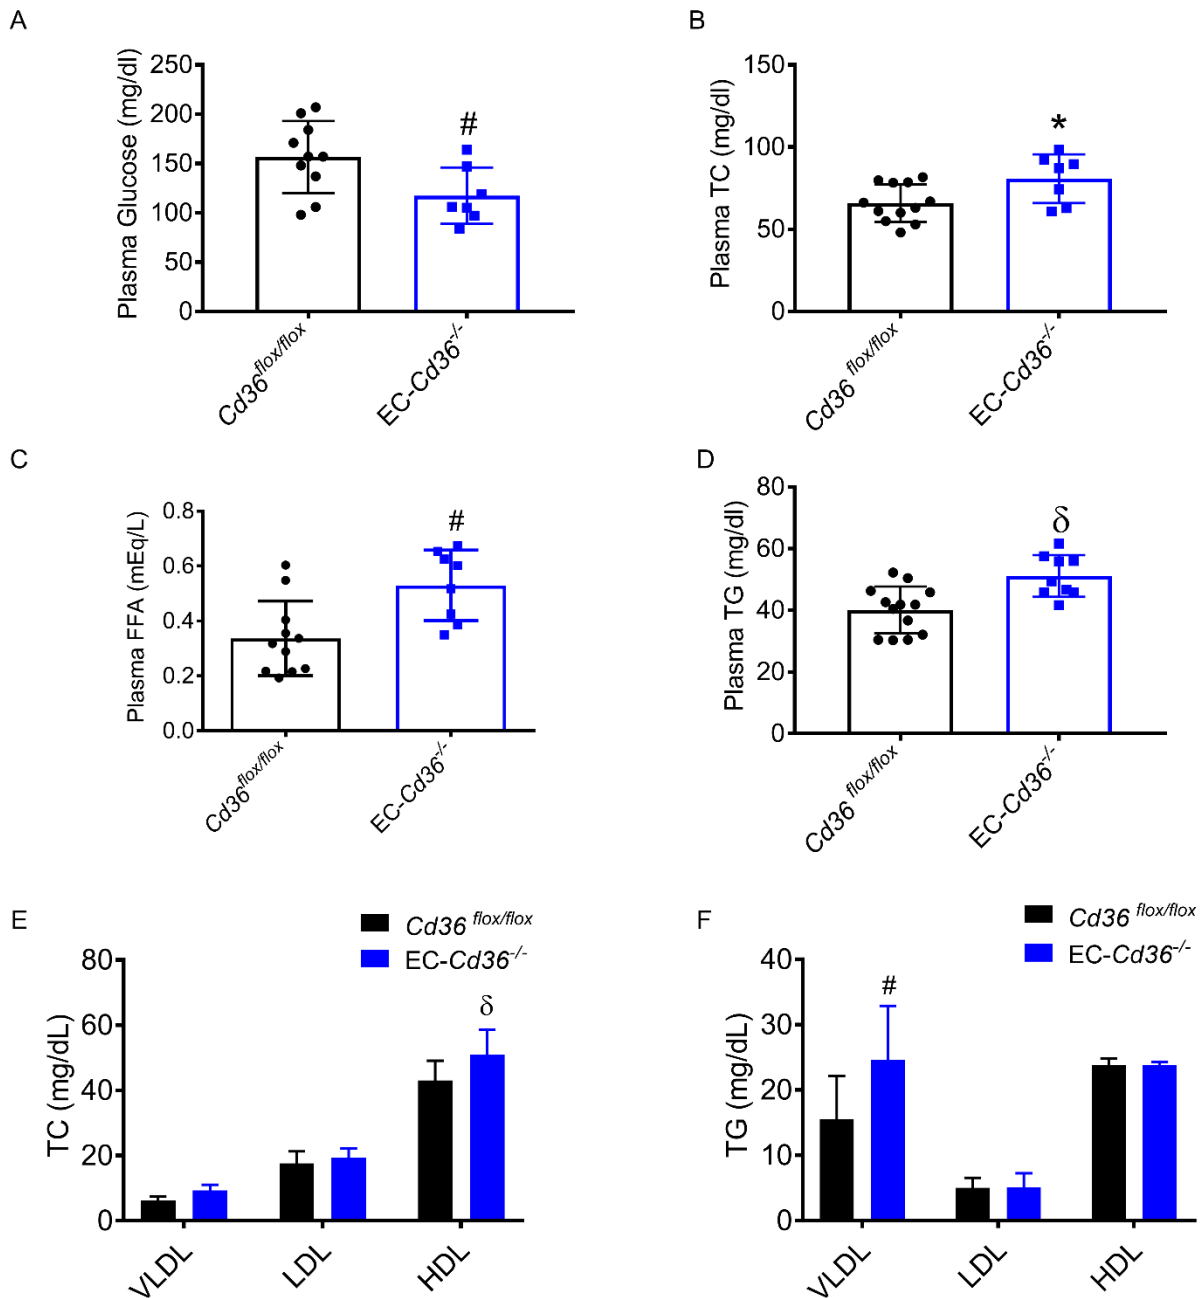

**Fig. S3. Increase of plasma glucose, lipids, and lipoprotein particles in 4-month-old EC-*Cd36*<sup>-/-</sup> female mice fed chow diet.** (A) Plasma glucose (B) TC, (C) FFA, and (D) TG. (E) TC and (F) TG levels of plasma lipoprotein particles. Data are means ± S.D (n=8-10). #P < 0.01 and §P < 0.001 compared to *Cd36*<sup>flox/flox</sup> mice. P values were calculated by one-way ANOVA with a Dunnett's multiple comparisons test.

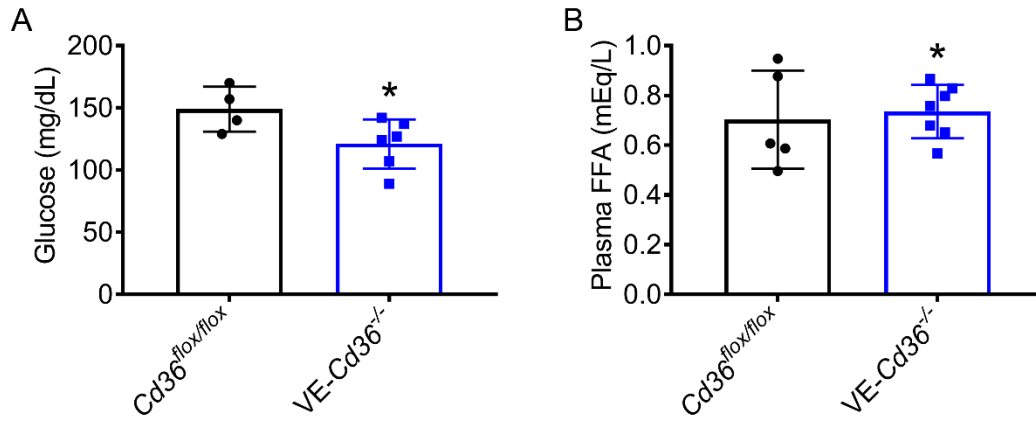

**Fig. S4. Decrease of plasma glucose and increase of plasma TC in *VE-Cd36<sup>-/-</sup>* male mice.** (A) Plasma glucose and (B) FFA in *VE-Cd36<sup>-/-</sup>* male mice. Data are means  $\pm$  S.D. (n=4-7). \*P < 0.05 compared to *Cd36<sup>flox/flox</sup>* mice. P values were calculated by one-way ANOVA with a Dunnett's multiple comparisons test.

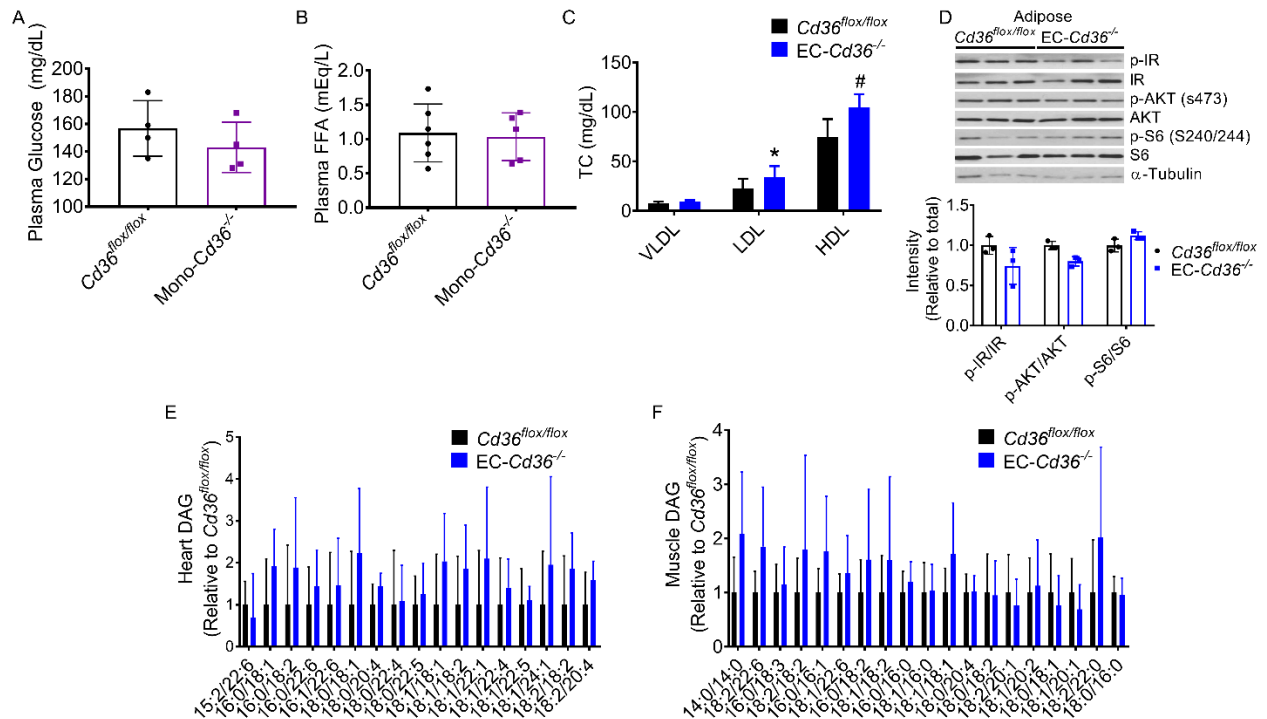

**Fig. S5. Plasma and tissue lipids** (A) Plasma glucose (n=4) and (B) FFA (n=5-6) in *Mono-Cd36<sup>-/-</sup>* mice (mRNA decreased 70% compared to *Cd36<sup>fllox/fllox</sup>* controls) fed chow diet. (C) Plasma lipoprotein TC levels in *EC-Cd36<sup>-/-</sup>* mice fed 3-week HFD. (D) Western blots (top) and quantification of p-IR, pAKT, and pS6 protein levels (normalized to total IR, Akt, or S6 signal, bottom) from WAT of HFD-fed *Cd36<sup>fllox/fllox</sup>* and *EC-Cd36<sup>-/-</sup>* mice. (E) Individual DAG species in the heart (n=4-5) and (F) muscle (n=9-10) of HFD-fed mice. Data are means  $\pm$  S.D. \*  $P < 0.05$  and # $P < 0.01$  compared to *Cd36<sup>fllox/fllox</sup>* mice. P values were calculated by one-way ANOVA with a Dunnett's multiple comparisons test.

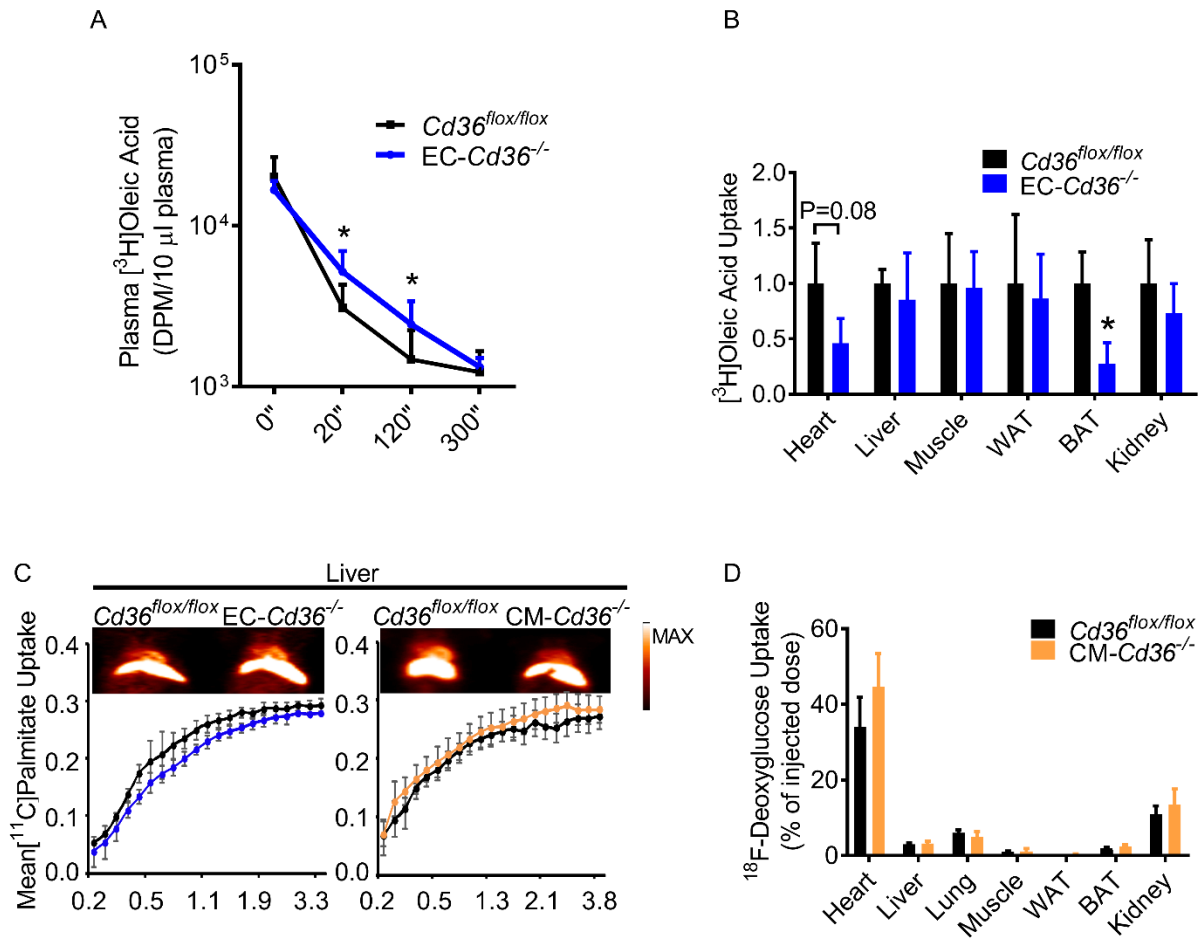

**Fig S6. LCFA and [<sup>18</sup>F]DG uptake in *EC-Cd36<sup>-/-</sup>* and *CM-Cd36<sup>-/-</sup>* mice.** (A) 4-5 month old female *Cd36<sup>flox/flox</sup>* and *EC-Cd36<sup>-/-</sup>* mice (n=5-6) were fasted for 16 hours; plasma radioactivity (B) their tissue [<sup>3</sup>H]oleic acid uptake (n=5-6) were measured at shown time points after intravenous injection of [<sup>3</sup>H]oleic acid and. (C) Real time [<sup>11</sup>C]palmitic acid uptake into liver of *Cd36<sup>flox/flox</sup>*, *EC-Cd36<sup>-/-</sup>*, and *CM-Cd36<sup>-/-</sup>* mice. Insert shows representative scans of [<sup>11</sup>C]palmitate uptake at 2 min after tracer administration. (D) [<sup>18</sup>F]DG uptake in 4-6 month old *CM-Cd36<sup>-/-</sup>* male mice. Data are means ± S.D. \*P < 0.05 compared to *Cd36<sup>flox/flox</sup>* controls. P values were calculated by one-way ANOVA with a Dunnett's multiple comparisons test.

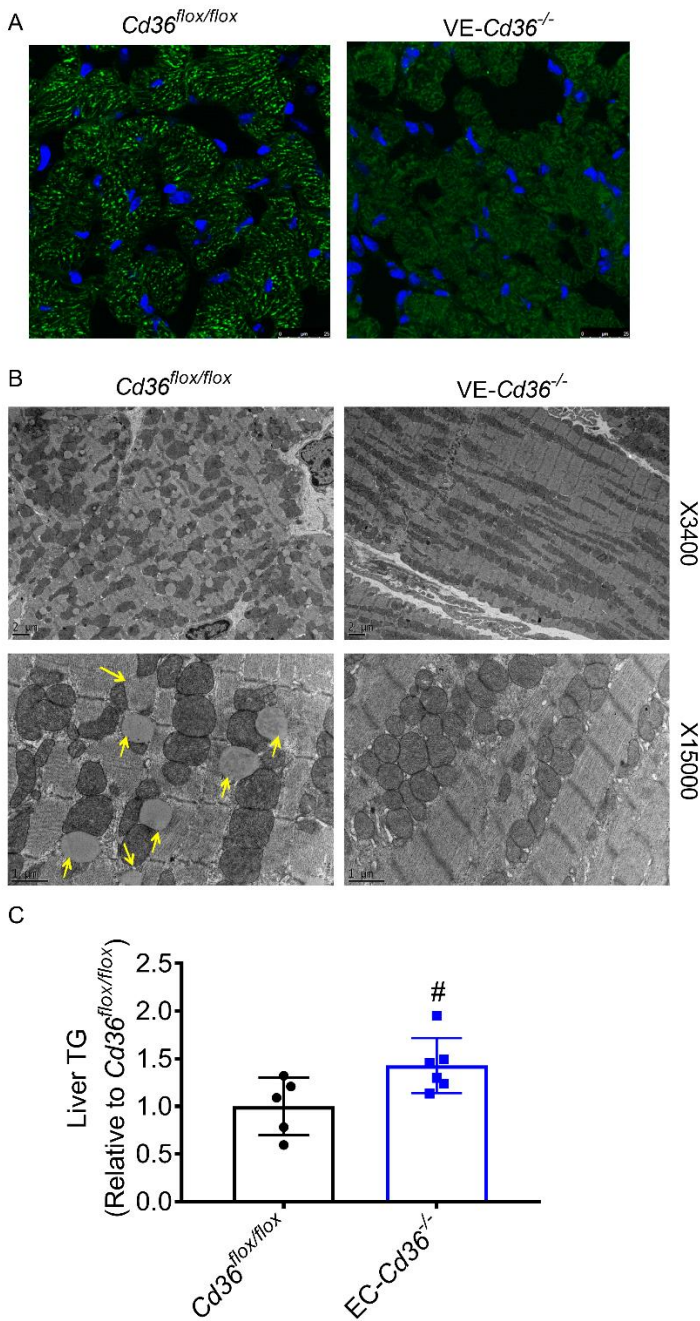

**Fig S7. Reduced heart lipid droplet accumulation in VE-*Cd36<sup>-/-</sup>* mice. (A)** BODIPY (493/503) staining of intramuscular lipid droplets in *Cd36<sup>flx/flx</sup>* and VE-*Cd36<sup>-/-</sup>* hearts. **(B)** EM images of *Cd36<sup>flx/flx</sup>* and VE-*Cd36<sup>-/-</sup>* heart tissues. **(C)** Liver TG content in EC- *Cd36<sup>-/-</sup>* mice (n=5-6). Data are means  $\pm$  S.D. <sup>#</sup>P < 0.01 compared to *Cd36<sup>flx/flx</sup>* mice. P values were calculated by one-way ANOVA with a Dunnett's multiple comparisons test.

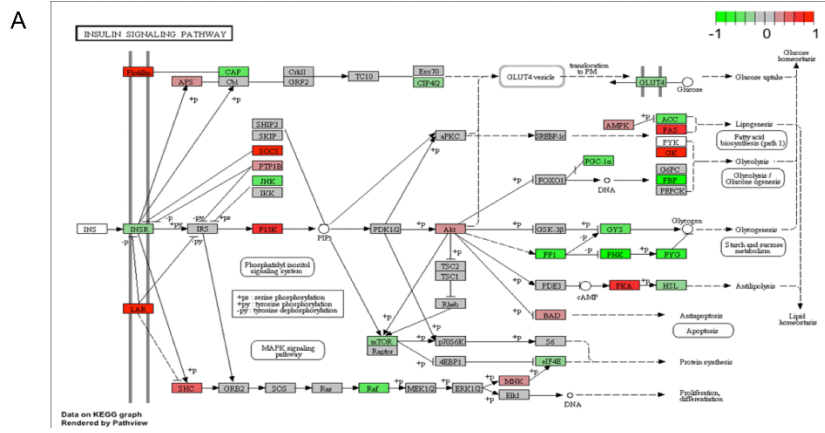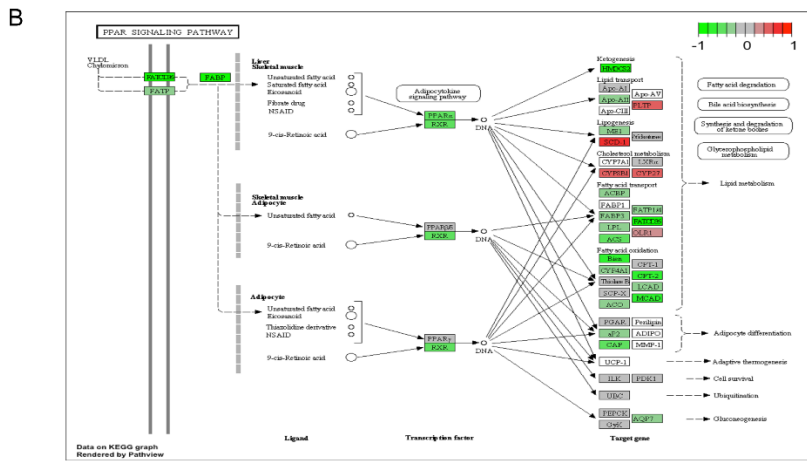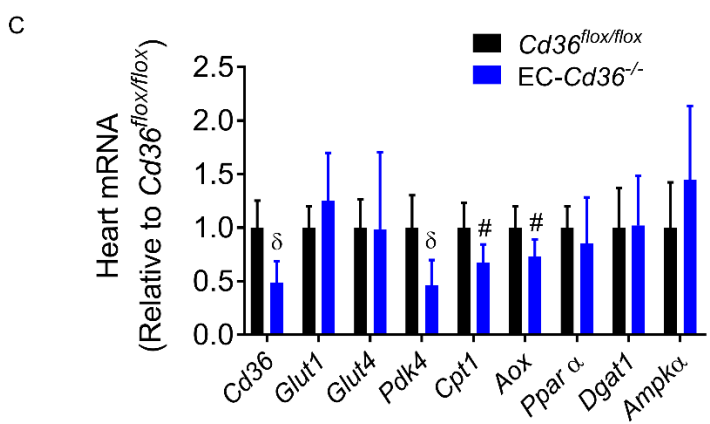

**Fig S8. CM- $Cd36^{-/-}$  KEGG analysis and female mouse heart mRNA expression. (A)** KEGG analysis of insulin signaling and **(B)** PPAR pathways in CM- $Cd36^{-/-}$  mouse hearts. **(C)** qRT-PCR analysis of mRNA expression in 4-5 month old female  $Cd36^{flox/flox}$  and  $EC-Cd36^{-/-}$  mice with 16 hours fasting (n=7-9). Data are means  $\pm$  S.D. #P < 0.01 and  $\delta$ P < 0.001 compared to  $Cd36^{flox/flox}$  controls. P values were calculated by one-way ANOVA with a Dunnett's multiple comparisons test.



|          | Primer sequences                                                                      | Amplification size<br>(base pair)            |
|----------|---------------------------------------------------------------------------------------|----------------------------------------------|
| Primer 1 | Sense: 5'-attggcatctgtgtagcgccttggc -3'<br>Antisense: 5'-tgctactatgcactccatgcaggc -3' | WT: 289 bp<br>Cd36 floxed allele: 372 bp     |
| Primer 2 | Sense: 5'-attggcatctgtgtagcgccttggc -3'<br>Antisense: 5'-tcaggaccatagcaagtaggc -3'    | WT: 2116 bp<br>Cd36 null allele: 420 bp      |
| Primer 3 | Sense: 5'-aacactgtgattgtacctg-3'<br>Antisense: 5'-tcaataagcatgtctccgac -3'            | WT: 160 bp<br>Cd36 null allele: undetectable |

**Supplementary Table 1.** Primers used for PCR amplification to detect DNA and mRNA from wild type, *Cd36*<sup>flox/flox</sup>, and *Cd36*<sup>-/-</sup> mice.
